# Supplementary material
Source: PubMed Central journal article supplement (PMC6142283)
Supplement: IMM-155-225-s001.pdf [file IMM-155-225-s001.pdf]

# Supplemental Figure 1

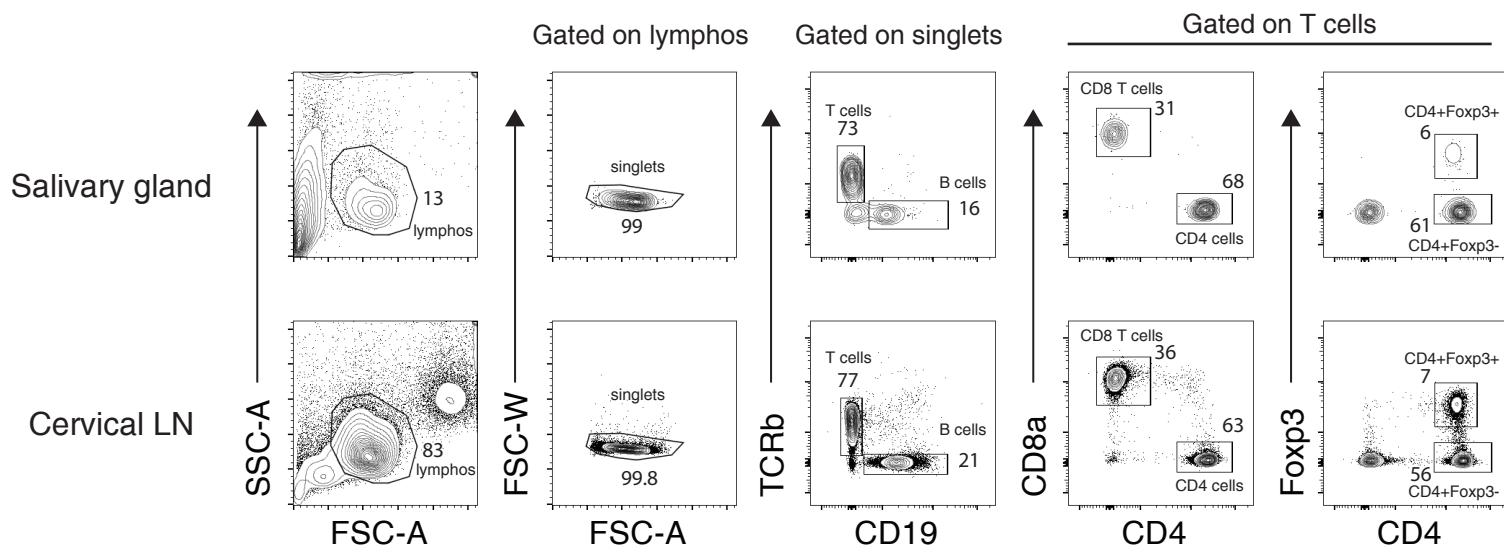

# Supplemental Figure 2

A

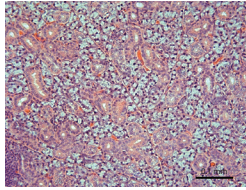

B

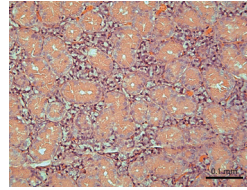

C

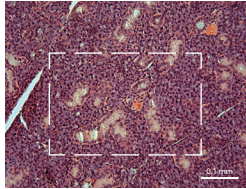

D

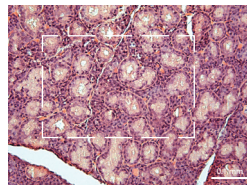

E

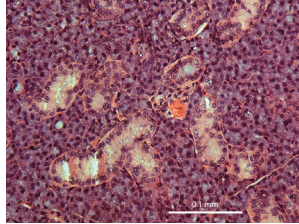

F

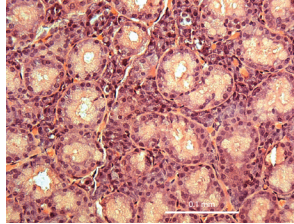

**Supplementary Figure 1.** Representative flow cytometry plots to depict gating strategy for salivary (top) and cervical LN (bottom) cell analyses as in Figure 1. Samples are from male NOD mice (19-21 week old) from which data in Figure 1 are derived. Gates are labeled to demonstrate populations on which subsequent plots are gated. Numbers indicate percentage of cells within the gate.

**Supplementary Figure 2.** Testosterone induces changes in salivary gland morphology in NOD and NOD-SCID mice. Representative H&E stained sections from salivary glands of male mice including (A) castrated NOD mice, (B) sham-castrated NOD mice, (C,E) female NOD-SCID mice, and (D,F) male NOD-SCID mice. These images demonstrate more prominent granular ducts in the presence of testosterone (sham-castrated male NOD and male NOD-SCID, B, D-F) as described in other strains.<sup>54,55</sup> Images in A-B represent tissues in Figure 5C with focus scores of 2.49 and 2.1 foci/4 mm<sup>2</sup>, chosen to demonstrate morphological differences in areas of the tissue without inflammatory foci despite a similar degree of inflammation overall (inflammatory foci not shown in image). Images in C-F represent tissues in Figure 3E with focus scores = 0 foci/4 mm<sup>2</sup>. Scale bars are 0.1 mm. Boxes in C-D are the areas shown in E-F, respectively, at higher magnification.
